# Supplementary material
Source: ML conference proceedings conference paper supplement (https://openreview.net/forum?id=ucuPqzu6vxz)
Supplement: supplementary_material [file attachment]

APPENDIX

*Proof of Theorem II.2.* The proof follows ideas from [18, Theorem 3.20] or [1, Theorem 3.2] and utilizes the discrete subsampling from [2]. By [2, Lemma 2.2 and Theorem 3.1] we obtain

$$\frac{n}{2} \leq \sigma_{\min}^2(\mathbf{L}) = \|(\mathbf{L}^* \mathbf{L})^{-1} \mathbf{L}^*\|_{2 \rightarrow 2}^2 \quad (5)$$

with probability  $1 - \exp(-t)$ . We split the approximation error as follows

$$\begin{aligned} \|f - S_{\mathbf{X}} \mathbf{f}\|_{L_2}^2 &= \|f - P_I f\|_{L_2}^2 + \|P_I f - S_{\mathbf{X}} \mathbf{f}\|_{L_2}^2 \\ &\leq \|f - P_I f\|_{L_2}^2 + 2\|P_I f - S_{\mathbf{X}} P_{I_M} \mathbf{f}\|_{L_2}^2 + 2\|S_{\mathbf{X}} P_{I_M} \mathbf{f} - S_{\mathbf{X}} \mathbf{f}\|_{L_2}^2. \end{aligned}$$

By event (5) and the invariance of  $S_{\mathbf{X}}$  to functions supported on  $I$ , we obtain

$$\begin{aligned} \|f - S_{\mathbf{X}} \mathbf{f}\|_{L_2}^2 &\leq \|f - P_I f\|_{L_2}^2 + \frac{4}{n} \sum_{i \in J} |(P_I f - P_{I_M} f)(\mathbf{x}^i)|^2 + \frac{4}{n} \sum_{i \in J} |(f - P_{I_M} f)(\mathbf{x}^i)|^2 \\ &\leq \|f - P_I f\|_{L_2}^2 + \frac{4}{n} \sum_{i \in J} |(P_I f - P_{I_M} f)(\mathbf{x}^i)|^2 + 4\|f - P_{I_M} f\|_{\infty}^2. \end{aligned} \quad (6)$$

We will estimate the middle summand by Bernstein's inequality, cf. [9, Corollary 7.31] or [24, Theorem 6.12]. We define random variables  $\xi_i = |(P_I f - P_{I_M} f)(\mathbf{x}^i)|^2 - \|P_{I_M} f - P_I f\|_{L_2}^2$ . By the reconstructing property, we have  $\frac{1}{M} \sum_{j=1}^M |(P_I f - P_{I_M} f)(\mathbf{x}^j)|^2 = \|P_{I_M} f - P_I f\|_{L_2}^2$  and, thus,  $\xi_i$  are mean zero. Further, we have

$$\|\xi_i\|_{\infty} \leq (\|P_I f - P_{I_M} f\|_{\infty} + \|P_I f - P_{I_M} f\|_{L_2})^2$$

and

$$\begin{aligned} \mathbb{E}(\xi_i^2) &= \mathbb{E}\left(\left(|(P_I f - P_{I_M} f)(\mathbf{x}^i)|^2\right)^2\right) + \|P_I f - P_{I_M} f\|_{L_2}^4 \\ &\leq \|P_I f - P_{I_M} f\|_{\infty}^2 \sum_{i=1}^M |(P_I f - P_{I_M} f)(\mathbf{x}^i)|^2 + \|P_I f - P_{I_M} f\|_{L_2}^4 \\ &\leq \|P_I f - P_{I_M} f\|_{L_2}^2 (\|P_I f - P_{I_M} f\|_{\infty} + \|P_I f - P_{I_M} f\|_{L_2})^2. \end{aligned}$$

Applying Bernstein's inequality yields

$$\begin{aligned} \frac{1}{n} \sum_{i \in J} |(P_I f - P_{I_M} f)(\mathbf{x}^i)|^2 - \|P_I f - P_{I_M} f\|_{L_2}^2 &\leq \frac{2t}{3n} (\|P_I f - P_{I_M} f\|_{\infty} + \|P_I f - P_{I_M} f\|_{L_2})^2 \\ &\quad + \sqrt{\frac{2t}{n}} \|P_I f - P_{I_M} f\|_{L_2} (\|P_I f - P_{I_M} f\|_{\infty} + \|P_I f - P_{I_M} f\|_{L_2}) \end{aligned}$$

with probability  $1 - \exp(-t)$ .

Plugging this in (6) and using  $\|P_{I_M} f - P_I f\|_{L_2} \leq \|f - P_I f\|_{L_2}$ , we obtain

$$\begin{aligned} \|f - S_{\mathbf{X}} \mathbf{f}\|_{L_2}^2 &\leq 5\|f - P_I f\|_{L_2}^2 + 2\sqrt{\frac{8t}{n}} \|f - P_I f\|_{L_2} \left( \|P_{I_M} f - P_I f\|_{\infty} + \|f - P_I f\|_{L_2} \right) \\ &\quad + \frac{8t}{3n} \left( \|P_{I_M} f - P_I f\|_{\infty} + \|f - P_I f\|_{L_2} \right)^2 + 4\|f - P_{I_M} f\|_{\infty}^2 \\ &\leq \left( \sqrt{5} \|f - P_I f\|_{L_2} + \sqrt{\frac{8t}{3n}} \left( \|P_{I_M} f - P_I f\|_{\infty} + \|f - P_I f\|_{L_2} \right) \right)^2 \\ &\quad + 4\|f - P_{I_M} f\|_{\infty}^2. \end{aligned}$$

Using the assumption on  $n$ , we have  $8t/3n \leq 2/9|I| \leq 2/9$  and further estimate

$$\|f - S_{\mathbf{X}} \mathbf{f}\|_{L_2}^2 \leq \left( 3\|f - P_I f\|_{L_2} + \sqrt{\frac{2}{9|I|}} \|P_{I_M} f - P_I f\|_{\infty} \right)^2 + 4\|f - P_{I_M} f\|_{\infty}^2.$$

The second part of the bound is obtained by applying Hölder's inequality:

$$\begin{aligned}\|P_{I_M}f - P_I f\|_\infty^2 &= \left\| \sum_{\mathbf{k} \in I_M \setminus I} \hat{f}_{\mathbf{k}} \exp(2\pi i \langle \mathbf{k}, \cdot \rangle) \right\|_\infty^2 \\ &\leq \left\| \sum_{\mathbf{k} \in I_M \setminus I} |\exp(2\pi i \langle \mathbf{k}, \cdot \rangle)|^2 \right\|_\infty \sum_{\mathbf{k} \in I_M \setminus I} |\hat{f}_{\mathbf{k}}|^2 \\ &= |I_M \setminus I| \|P_{I_M}f - P_I f\|_{L_2}^2 \leq |I_M \setminus I| \|f - P_I f\|_{L_2}^2.\end{aligned}$$

By union bound we obtain the overall probability. ■

**Lemma A.1.** For  $X$  uniformly distributed on  $\mathbb{T}^d$ , we have

$$\mathbb{P}(|g(X)| \geq \delta') \geq \frac{\|g\|_{L_2}^2 - \delta'^2}{\|g\|_\infty^2}.$$

*Proof.* Consequence of [19, Par. 9.3.A] for  $h(t) = t^2$ . ■

*Proof of Theorem III.1.* From Lemma A.1 follows

$$\mathbb{P}(|\hat{f}_{\{1, \dots, t\}, \mathbf{k}}(\boldsymbol{\xi})| \geq \delta') \geq \frac{\|\hat{f}_{\{1, \dots, t\}, \mathbf{k}}\|_{L_2}^2 - \delta'^2}{\|\hat{f}_{\{1, \dots, t\}, \mathbf{k}}\|_\infty^2} =: p_{\mathbf{k}}.$$

Let  $\bar{p} = \max_{\mathbf{k} \in \mathcal{P}_{\{1, \dots, t\}}(I_\delta)} p_{\mathbf{k}}$ . By union bound, we have the successful detection with probability exceeding  $1 - |I_\delta|(1 - \bar{p})^r$ . This is smaller or equal  $1 - \varepsilon$  whenever

$$r \leq -\frac{\log |I_\delta| + \log(1/\varepsilon)}{\log(1 - \bar{p})}. \quad (7)$$

Since  $p_{\mathbf{k}} \in (0, 1)$ , we obtain

$$-\frac{1}{\log(1 - p_{\mathbf{k}})} \leq \frac{1}{p_{\mathbf{k}}} = \frac{\|\hat{f}_{\{1, \dots, t\}, \mathbf{k}}\|_\infty^2}{\|\hat{f}_{\{1, \dots, t\}, \mathbf{k}}\|_{L_2}^2 - \delta'^2} \leq \frac{(\sum_{(\mathbf{k}, \mathbf{l}) \in \mathbb{Z}^{d-t}} |\hat{f}_{(\mathbf{k}, \mathbf{l})}|)^2}{\sum_{(\mathbf{k}, \mathbf{l}) \in \mathbb{Z}^{d-t}} |\hat{f}_{(\mathbf{k}, \mathbf{l})}|^2 - \delta'^2}.$$

With  $\mathbf{k} \in \mathcal{P}_{\{1, \dots, t\}}(I_\delta)$  we have

$$\delta'^2 \leq \delta^2/2 \leq \frac{1}{2} \sum_{(\mathbf{k}, \mathbf{l}) \in \mathbb{Z}^{d-t}} |\hat{f}_{(\mathbf{k}, \mathbf{l})}|^2.$$

Consequently,

$$\begin{aligned}-\frac{1}{\log(1 - p_{\mathbf{k}})} &\leq 2 \frac{(\sum_{(\mathbf{k}, \mathbf{l}) \in \mathbb{Z}^{d-t}} |\hat{f}_{(\mathbf{k}, \mathbf{l})}|)^2}{\sum_{(\mathbf{k}, \mathbf{l}) \in \mathbb{Z}^{d-t}} |\hat{f}_{(\mathbf{k}, \mathbf{l})}|^2} \\ &\leq 4 \frac{(\sum_{(\mathbf{k}, \mathbf{l}) \in \mathcal{P}_{\{1, \dots, t\}, \mathbf{k}}(I_\delta)} |\hat{f}_{(\mathbf{k}, \mathbf{l})}|)^2}{\sum_{(\mathbf{k}, \mathbf{l}) \in \mathbb{Z}^{d-t}} |\hat{f}_{(\mathbf{k}, \mathbf{l})}|^2} + 4 \frac{(\sum_{(\mathbf{k}, \mathbf{l}) \notin \mathcal{P}_{\{1, \dots, t\}, \mathbf{k}}(I_\delta)} |\hat{f}_{(\mathbf{k}, \mathbf{l})}|)^2}{\sum_{(\mathbf{k}, \mathbf{l}) \in \mathbb{Z}^{d-t}} |\hat{f}_{(\mathbf{k}, \mathbf{l})}|^2} \\ &\leq 4|\mathcal{P}_{\{1, \dots, t\}, \mathbf{k}}(I_\delta)| + \frac{4}{\delta^2} \left( \sum_{(\mathbf{k}, \mathbf{l}) \notin \mathcal{P}_{\{1, \dots, t\}, \mathbf{k}}(I_\delta)} |\hat{f}_{(\mathbf{k}, \mathbf{l})}| \right)^2 \\ &\leq 4|I_\delta| + \frac{4}{\delta^2} \left( \sum_{\mathbf{l} \notin I_\delta} |\hat{f}_{\mathbf{l}}| \right)^2.\end{aligned}$$

Plugging this into (7) we obtain the assertion. ■

*Proof of Theorem III.2.* By Theorem III.1 we have

$$\begin{aligned}\frac{\delta}{\sqrt{2}} &\leq \max_{i=1, \dots, r} |\hat{f}_{\{1, \dots, t\}, \mathbf{k}}(\boldsymbol{\xi}^i)| \\ &\leq \max_{i=1, \dots, r} |\hat{f}_{\{1, \dots, t\}, \mathbf{k}}(\boldsymbol{\xi}^i) - \hat{g}_{\{1, \dots, t\}, \mathbf{k}}(\boldsymbol{\xi}^i)| + |\hat{g}_{\{1, \dots, t\}, \mathbf{k}}(\boldsymbol{\xi}^i)|.\end{aligned}$$

Next, we show a bound on the above difference in order to obtain the desired threshold. We have

$$\begin{aligned}|\hat{f}_{\{1, \dots, t\}, \mathbf{k}}(\boldsymbol{\xi}^i) - \hat{g}_{\{1, \dots, t\}, \mathbf{k}}(\boldsymbol{\xi}^i)|^2 &\leq \sum_{\mathbf{k} \in I_{\{1, \dots, t\}}} |\hat{f}_{\{1, \dots, t\}, \mathbf{k}}(\boldsymbol{\xi}^i) - \hat{g}_{\{1, \dots, t\}, \mathbf{k}}(\boldsymbol{\xi}^i)|^2 \\ &\leq \|f(\cdot, \boldsymbol{\xi}^i) - S_{\mathbf{X}} f(\cdot, \boldsymbol{\xi}^i)\|_{L_2}^2.\end{aligned}$$

Using Theorem 2.2 and the assumption on the carnality of the frequency index sets, we obtain

$$\begin{aligned}
& |\hat{f}_{\{1,\dots,t\},\mathbf{k}}(\boldsymbol{\xi}^i) - \hat{g}_{\{1,\dots,t\},\mathbf{k}}(\boldsymbol{\xi}^i)|^2 \\
& \leq \left(3 + \sqrt{\frac{2|I_{\{1,\dots,t\}}^M \setminus I_{\{1,\dots,t\}}|}{9|I_{\{1,\dots,t\}}|}}\right)^2 \|f(\cdot, \boldsymbol{\xi}^i) - P_{I_{\{1,\dots,t\}}}f(\cdot, \boldsymbol{\xi}^i)\|_{L_2}^2 \\
& \quad + 4\|f(\cdot, \boldsymbol{\xi}^i) - P_{I_{\{1,\dots,t\}}^M}f(\cdot, \boldsymbol{\xi}^i)\|_{\infty}^2 \\
& \leq 16\|f(\cdot, \boldsymbol{\xi}^i) - P_{I_{\{1,\dots,t\}}}f(\cdot, \boldsymbol{\xi}^i)\|_{L_2}^2 + 4\|f(\cdot, \boldsymbol{\xi}^i) - P_{I_{\{1,\dots,t\}}^M}f(\cdot, \boldsymbol{\xi}^i)\|_{\infty}^2
\end{aligned}$$

with probability

$$1 - 2r \exp(-t) \quad \text{and} \quad |\mathbf{X}| \geq 12|I_{\{1,\dots,t\}}|(\log |I_{\{1,\dots,t\}}| + t),$$

where union bound was used over the detection iterations. Setting  $t = \log(2r/\varepsilon)$  we obtain the assertion. ■
